# Supplementary material
Source: MDPI journal article supplement (https://www.mdpi.com/search?q=molecules-25-01684)
Supplement: s001 [file molecules-25-01684-s001.pdf]

# Determination of D-cycloserine Impurities in Pharmaceutical Dosage Forms: Comparison of The International Pharmacopoeia HPLC-UV Method and DOSY NMR Method

Damjan Makuc<sup>1,#</sup>, Živa Švab<sup>2,5,#,§</sup>, Katerina Naumoska<sup>3</sup>, Janez Plavec<sup>1,2,4</sup> and Zdenko Časar<sup>5,6,\*</sup>

<sup>1</sup> Slovenian NMR Centre, National Institute of Chemistry, Hajdrihova 19, SI-1000 Ljubljana, Slovenia; damjan.makuc@ki.si, janez.plavec@ki.si

<sup>2</sup> University of Ljubljana, Faculty of Chemistry and Chemical Technology, Večna pot 113, SI-1001 Ljubljana, Slovenia; janez.plavec@fkkt.uni-lj.si

<sup>3</sup> Department of Food Chemistry, National Institute of Chemistry, Hajdrihova 19, SI-1000 Ljubljana, Slovenia; katerina.naumoska@ki.si

<sup>4</sup> EN-FIST Centre of Excellence, Trg Osvobodilne fronte 13, SI-1000 Ljubljana, Slovenia; janez.plavec@enfist.si

<sup>5</sup> Lek Pharmaceuticals d.d., Sandoz Development Center Slovenia, Verovškova ulica 57, SI-1526 Ljubljana, Slovenia

<sup>6</sup> University of Ljubljana, Faculty of Pharmacy, Aškerčeva cesta 7, SI-1000, Ljubljana, Slovenia

# These authors contributed equally

§ Current position at: Biotechnology Development Unit, International Institute for Genetic Engineering and Biotechnology, Trieste, Italy; ziva.marsetic@icgeb.org

\* Correspondence: zdenko.casar@sandoz.com or zdenko.casar@ffa.uni-lj.si; Tel.: +386-1-5802079; Fax: +386-1-5683517

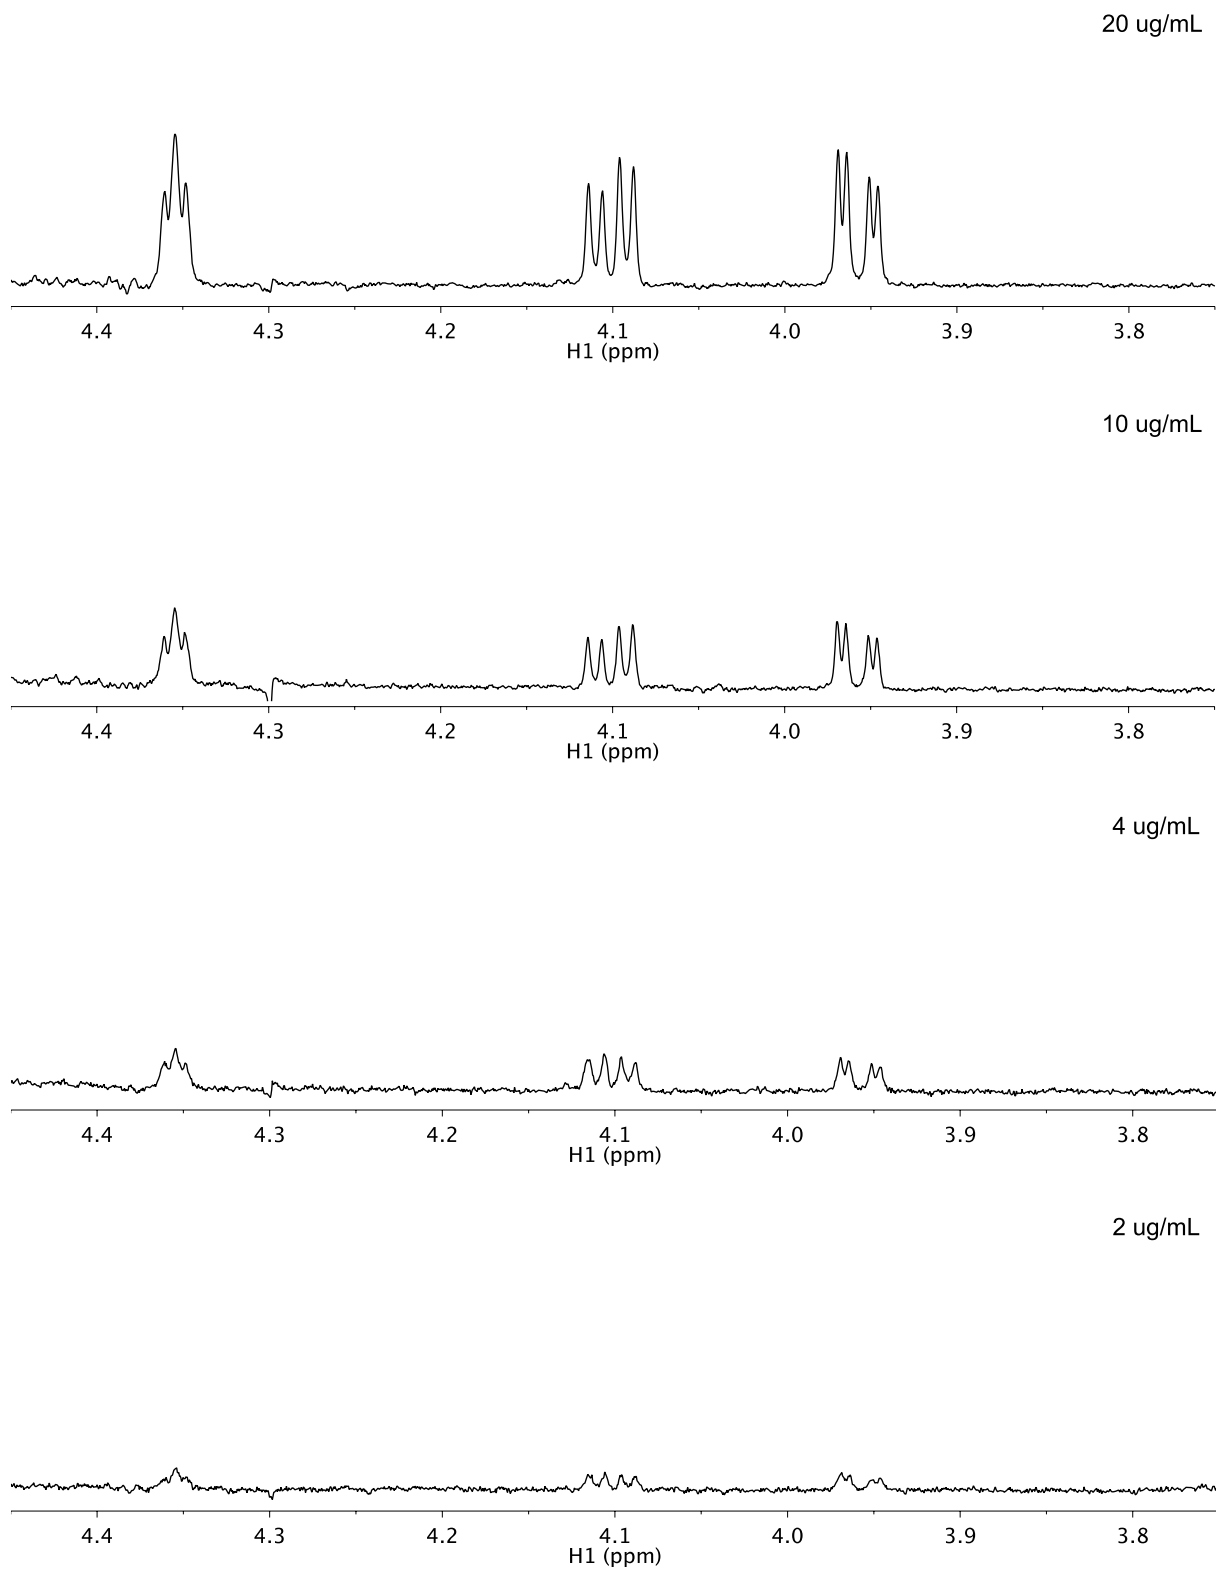

**Figure S1:**  $^1\text{H}$  NMR spectra of cycloserine dimer in  $\text{D}_2\text{O}$  at 25  $^\circ\text{C}$ , concentrations between 2 and 20  $\mu\text{g mL}^{-1}$ .

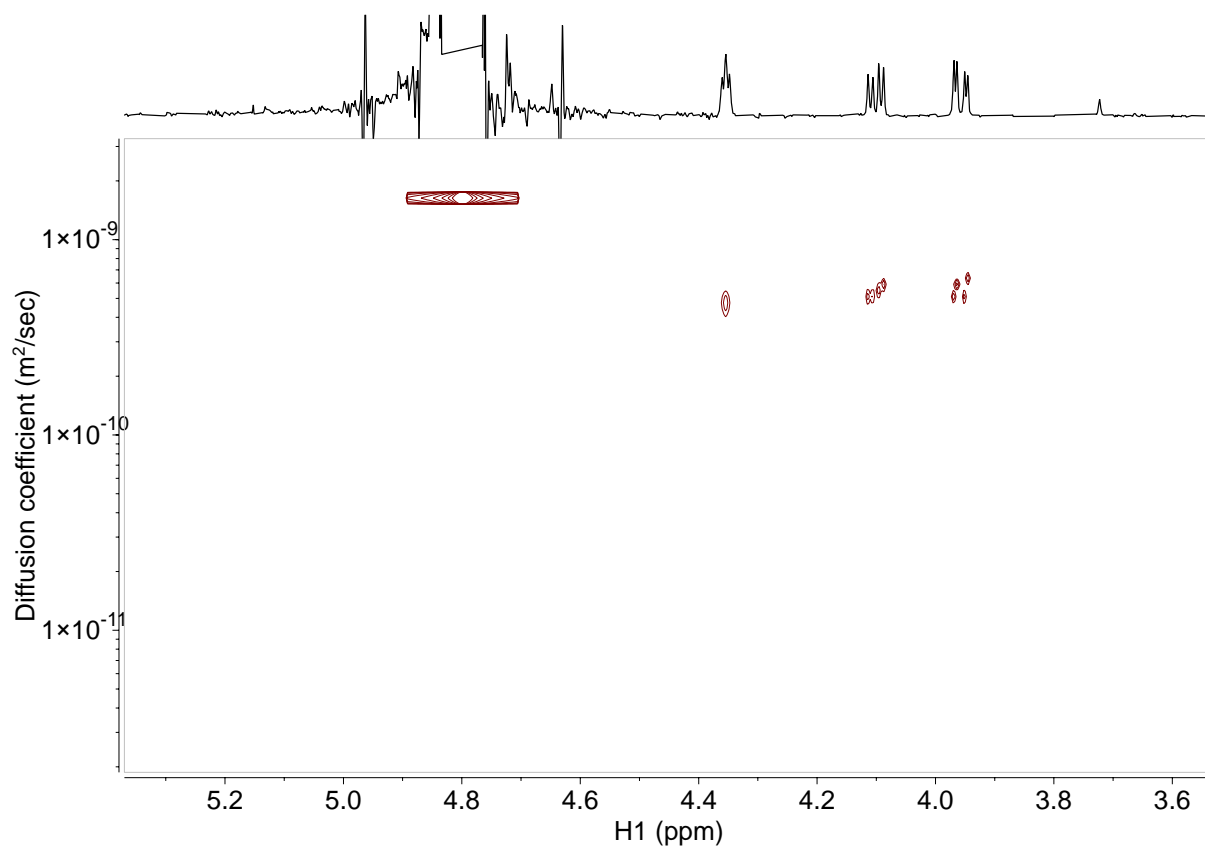

**Figure S2.**  $^1\text{H}$  NMR (top) and  $^1\text{H}$  DOSY NMR spectra (bottom) of cycloserine dimer at concentration  $20 \mu\text{g mL}^{-1}$ .

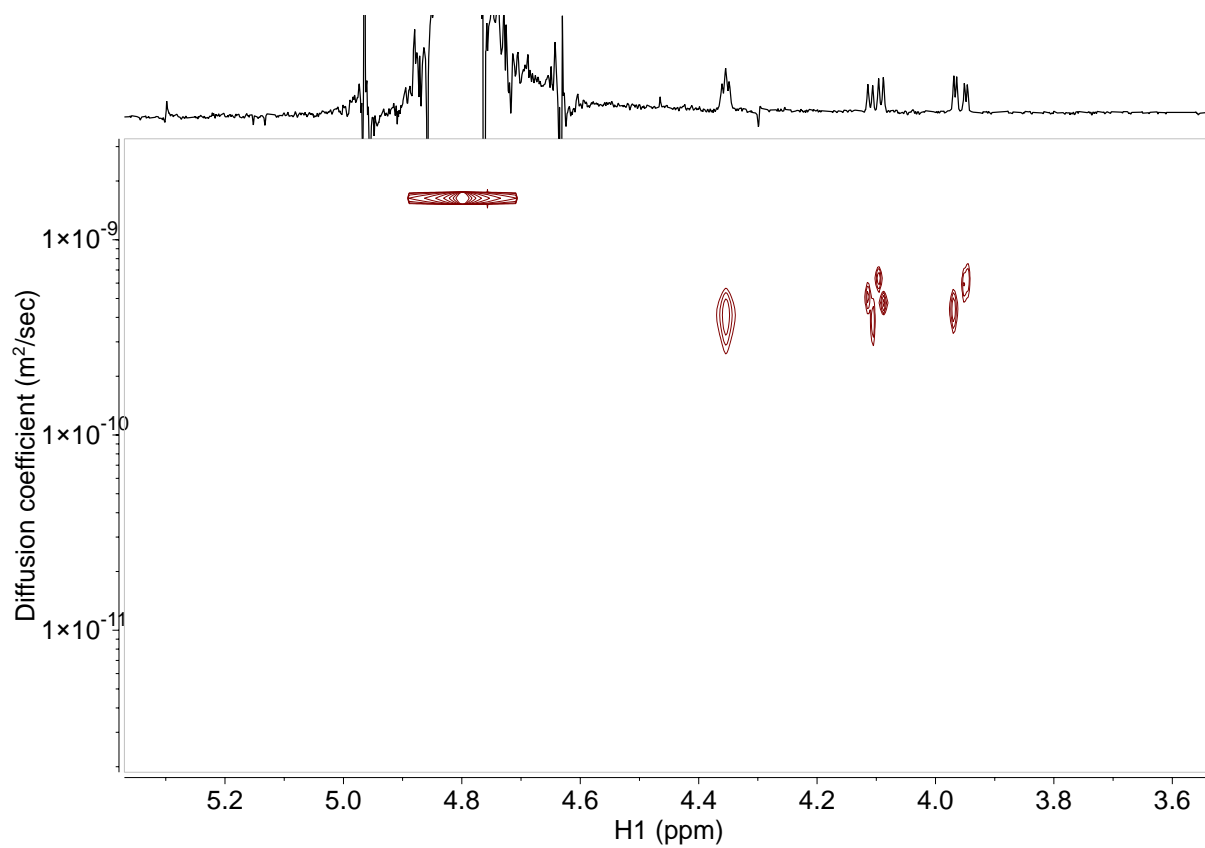

**Figure S3.**  $^1\text{H}$  NMR (top) and  $^1\text{H}$  DOSY NMR spectra (bottom) of cycloserine dimer at concentration  $10 \mu\text{g mL}^{-1}$ .

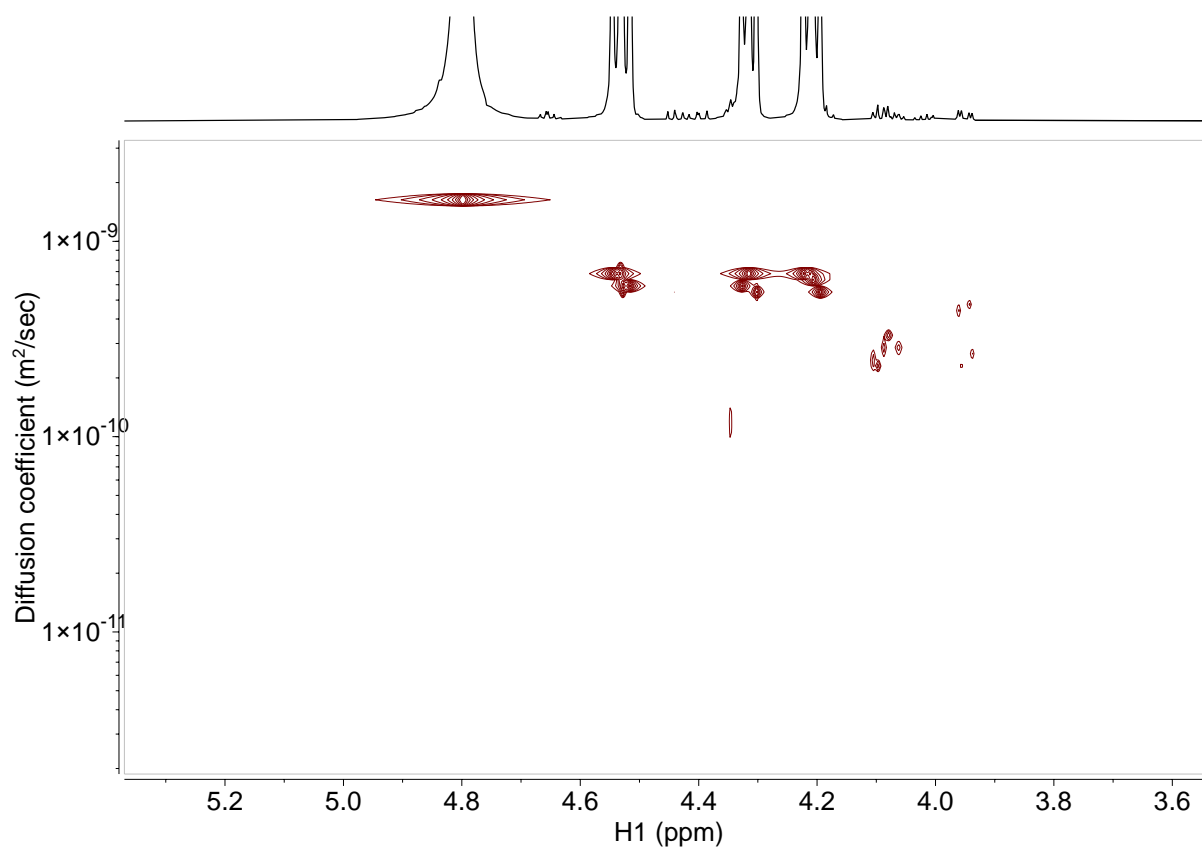

**Figure S4.**  $^1\text{H}$  NMR (top) and  $^1\text{H}$  DOSY NMR spectra (bottom) of D-cycloserine and cycloserine dimer within the quantification limit (0.05% relative to the concentration of D-cycloserine in the sample solution). Diffusion constant (D) is reported in  $\text{m}^2\text{s}^{-1} \times 10^{-10}$ .

cycloserine dimer

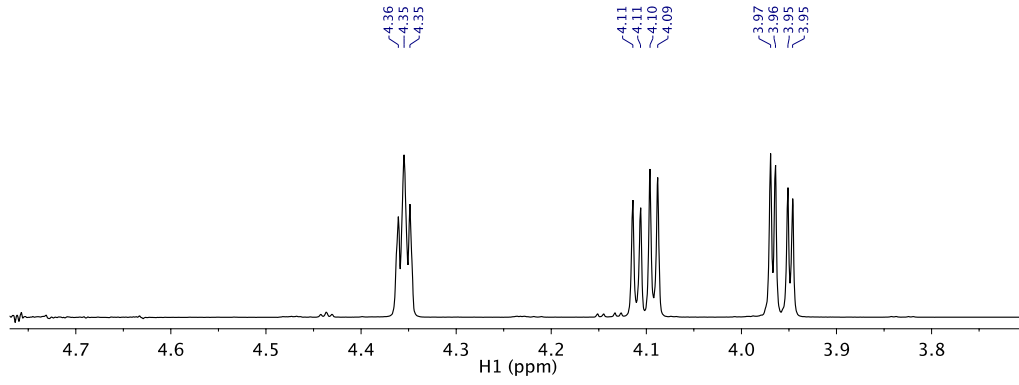

D-serine

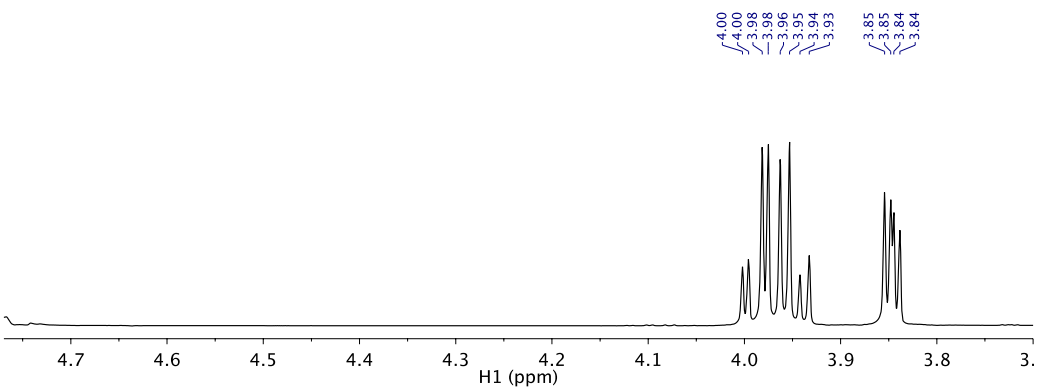

3-chloro-D-alanine methyl ester hydrochloride

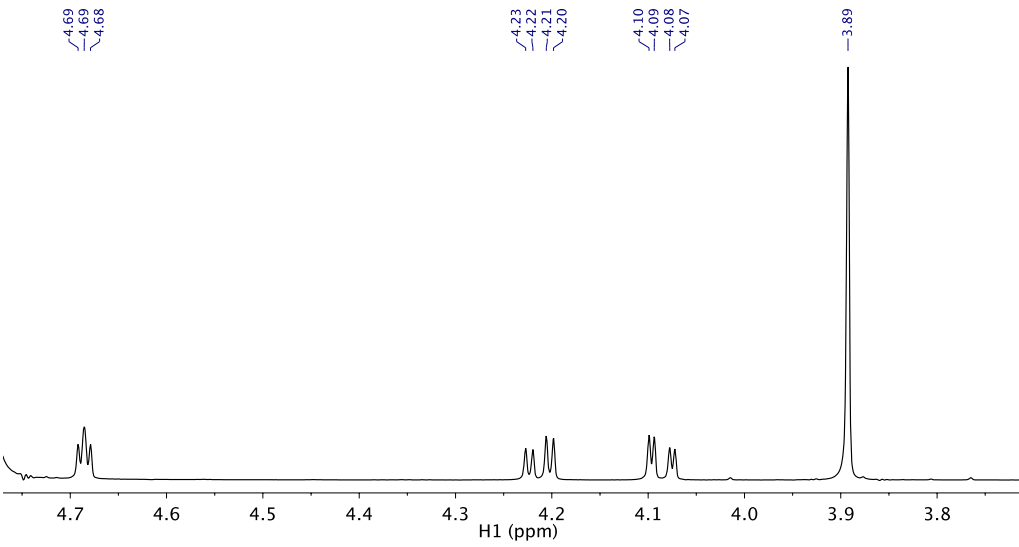

D-cycloserine

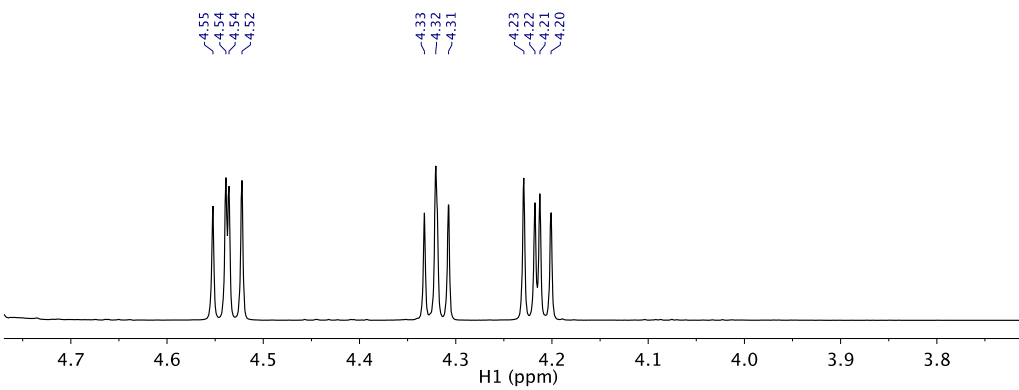

Figure S5.  $^1\text{H}$  NMR spectra of D-cycloserine and impurities in  $\text{D}_2\text{O}$  at  $25^\circ\text{C}$ .

**Table S1.** NMR stability test for D-cycloserine in sample solution.<sup>1</sup>

| <b>t (min)</b> | <b>m<sub>x</sub> (mg)</b> | <b>I<sub>x</sub></b> | <b>I<sub>RS</sub></b> | <b>N<sub>x</sub></b> | <b>N<sub>RS</sub></b> | <b>P<sub>x</sub> (%)</b> |
|----------------|---------------------------|----------------------|-----------------------|----------------------|-----------------------|--------------------------|
| 0              | 2.090                     | 0.473                | 2.000                 | 1                    | 2                     | <b>91.4</b>              |
| 30             | 2.090                     | 0.466                | 2.000                 | 1                    | 2                     | <b>90.1</b>              |
| 60             | 2.090                     | 0.463                | 2.000                 | 1                    | 2                     | <b>89.5</b>              |

<sup>1</sup> M<sub>x</sub> = 102.09 gmol<sup>-1</sup>, m<sub>RS</sub> = 4.594 mg, M<sub>RS</sub> = 116.07 gmol<sup>-1</sup>, P<sub>RS</sub> = 99.98.

**Table S2.** NMR stability test for cycloserine dimer in sample solution.<sup>1</sup>

| <b>t (min)</b> | <b>m<sub>x</sub> (mg)</b> | <b>I<sub>x</sub></b> | <b>I<sub>RS</sub></b> | <b>N<sub>x</sub></b> | <b>N<sub>RS</sub></b> | <b>P<sub>x</sub> (%)</b> |
|----------------|---------------------------|----------------------|-----------------------|----------------------|-----------------------|--------------------------|
| 0              | 1.780                     | 0.445                | 2.000                 | 2                    | 2                     | <b>101.0</b>             |
| 30             | 1.780                     | 0.438                | 2.000                 | 2                    | 2                     | <b>99.4</b>              |
| 60             | 1.780                     | 0.434                | 2.000                 | 2                    | 2                     | <b>98.5</b>              |

<sup>1</sup> M<sub>x</sub> = 204.20 gmol<sup>-1</sup>, m<sub>RS</sub> = 4.594 mg, M<sub>RS</sub> = 116.07 gmol<sup>-1</sup>, P<sub>RS</sub> = 99.98.

**Table S3.** NMR stability test for 3-chloro-D-alanine methyl ester HCl in sample solution.<sup>1</sup>

| <b>t (min)</b> | <b>m<sub>x</sub> (mg)</b> | <b>I<sub>x</sub></b> | <b>I<sub>RS</sub></b> | <b>N<sub>x</sub></b> | <b>N<sub>RS</sub></b> | <b>P<sub>x</sub> (%)</b> |
|----------------|---------------------------|----------------------|-----------------------|----------------------|-----------------------|--------------------------|
| 0              | 2.161                     | 0.939                | 2.000                 | 3                    | 2                     | <b>99.7</b>              |
| 30             | 2.161                     | 0.941                | 2.000                 | 3                    | 2                     | <b>100.0</b>             |
| 60             | 2.161                     | 0.936                | 2.000                 | 3                    | 2                     | <b>99.4</b>              |

<sup>1</sup> M<sub>x</sub> = 174.03 gmol<sup>-1</sup>, m<sub>RS</sub> = 4.594 mg, M<sub>RS</sub> = 116.07 gmol<sup>-1</sup>, P<sub>RS</sub> = 99.98.

**Table S4.** NMR stability test for D-serine in sample solution.<sup>1</sup>

| <b>t (min)</b> | <b>m<sub>x</sub> (mg)</b> | <b>I<sub>x</sub></b> | <b>I<sub>RS</sub></b> | <b>N<sub>x</sub></b> | <b>N<sub>RS</sub></b> | <b>P<sub>x</sub> (%)</b> |
|----------------|---------------------------|----------------------|-----------------------|----------------------|-----------------------|--------------------------|
| 0              | 5.628                     | 1.365                | 2.000                 | 1                    | 2                     | <b>100.9</b>             |
| 30             | 5.628                     | 1.370                | 2.000                 | 1                    | 2                     | <b>101.2</b>             |
| 60             | 5.628                     | 1.367                | 2.000                 | 1                    | 2                     | <b>101.0</b>             |

<sup>1</sup> M<sub>x</sub> = 105.09 gmol<sup>-1</sup>, m<sub>RS</sub> = 4.594 mg, M<sub>RS</sub> = 116.07 gmol<sup>-1</sup>, P<sub>RS</sub> = 99.98.

The stability of solution was tested over period of 0, 30 and 60 minutes. Results in Table S1 show that content (purity) of D-cycloserine dropped almost 2.0 % in 60 minutes. In addition, content of cycloserine dimer dropped 2.5 %. The other two analytes (3-chloro-D-alanine methyl ester HCl and D-serine) showed stability over the period of 1 hour. Based on stability test, all sample solution used for quantitative NMR measurements were freshly prepared and sample were dissolved just before acquisition of NMR data.

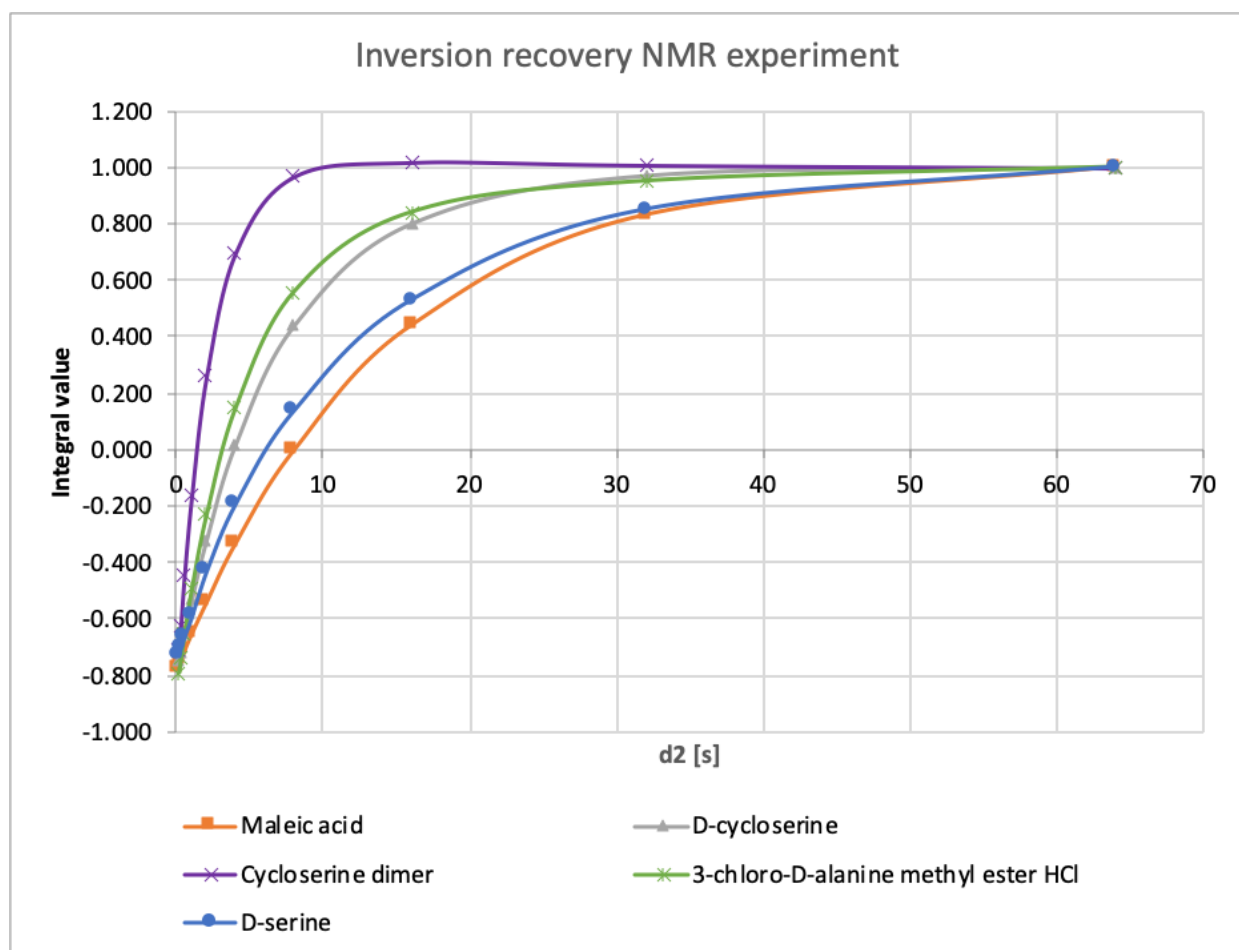

**Figure S6.**  $T_1$  relaxation times were determined using the inversion recovery experiment operating on the basis of a  $180^\circ$  pulse, followed by a  $90^\circ$  pulse after a variable delay  $d_2$ . The following  $T_1$  relaxation times were determined for  $^1\text{H}$  signals that were used for quantitative analysis: 5.60 s (D-cycloserine), 1.99 s (cycloserine dimer), 4.62 s (3-chloro-D-alanine methyl ester HCl), 9.09 s (D-serine) and 11.54 s (maleic acid). Relaxation delay  $d_1=60$  s (at least  $5 \times$  the longest resulting  $T_1$ ) was used for all quantitative NMR measurements in the current study.

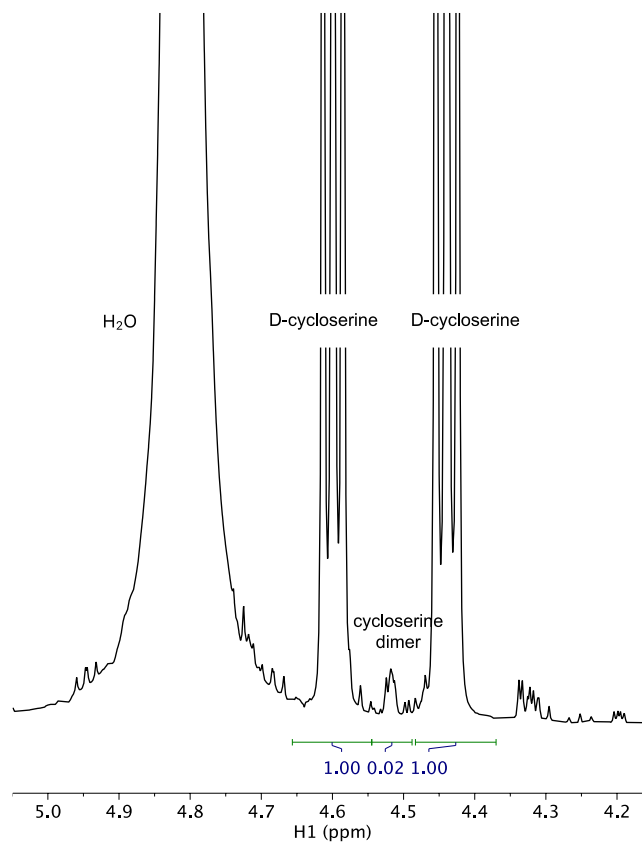

**Figure S7.** <sup>1</sup>H NMR spectra were used to establish concentration of cycloserine dimer (0.1 mg mL<sup>-1</sup>) in sample solution, which corresponds to 2% of D-cycloserine and is above specification limit <sup>1</sup>H NMR spectra of D-cycloserine and impurities in D<sub>2</sub>O at 25 °C.
